# Supplementary material
Source: PubMed Central journal article supplement (PMC5423194)
Supplement: MOL2-10-1221-s001.pdf [file MOL2-10-1221-s001.pdf]

# Supp Data 1

A

## TaqMelt PCR

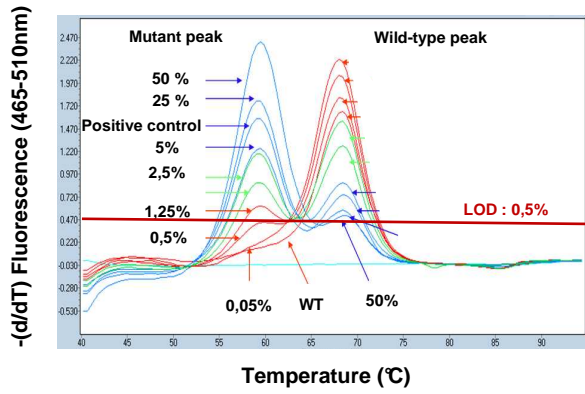

B

## High Resolution Melting

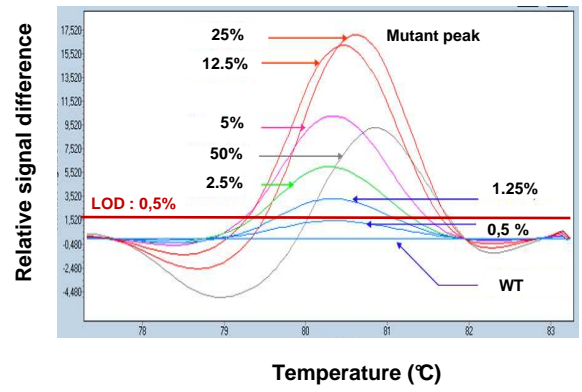

**Supp. Data 1.** Sensitivity determination of the mutant ratio using TaqMelt PCR or HRM. LOD, limit of detection. Wt control, DNA containing only *KRAS* wild-type. Positive control, DNA containing a 1:1 mix of mutant and wild-type *KRAS*
