# Supplementary material
Source: PubMed Central journal article supplement (PMC5423194)
Supplement: MOL2-10-1221-s003.pdf [file MOL2-10-1221-s003.pdf]

### Supp Data 3

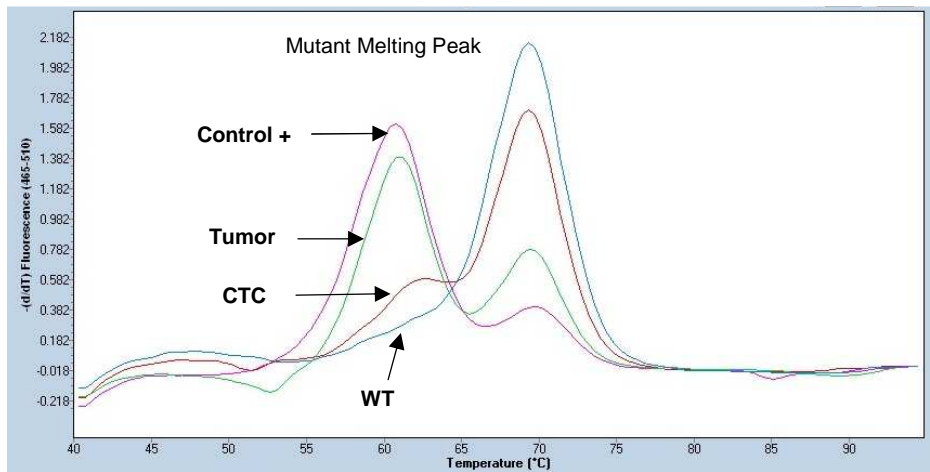

**Supp. Data 3.** Determination of *KRAS* status in the tumor and the CTCs for patient 24 by TaqMelt PCR. Wt control, DNA containing only *KRAS* wild-type. Positive control, DNA containing a 1:1 mix of mutant and wild-type *KRAS*
